# Supplementary material for: Unexpected efficiency enhancement of flexible dye-sensitized solar cells by repeated outward bending
Source: Royal Society of Chemistry journal article supplement (doi:10.1039/c5ra19365f), 2015-01-01
Supplement: c5ra19365f1.pdf [file c5ra19365f1.pdf]

# Electronic Supplementary Information

*for*

## **Unexpected efficiency enhancement of flexible dye-sensitized solar cells by repeated outward bending**

Xue-Long He,<sup>a,b</sup> Mei Liu,<sup>a</sup> Guan-Jun Yang,<sup>\*,a</sup> Baizeng Fang<sup>\*,c</sup> and Chang-Jiu Li<sup>a</sup>

<sup>a</sup> State Key Laboratory for Mechanical Behavior of Materials, School of Materials Science and Engineering, Xi'an Jiaotong University, Xi'an, Shaanxi, 710049, PR China. Tel.: +86-29-82665299, E-mail address: [ygj@mail.xjtu.edu.cn](mailto:ygj@mail.xjtu.edu.cn) (G.J. Yang)

<sup>b</sup> Jiangxi Province Key Laboratory of Precision Drive and Control, Nanchang 330099, PR China.

<sup>c</sup> Department of Chemical and Biological Engineering, University of British Columbia, 2360 East Mall, Vancouver, BC, V6T 1Z3, Canada, Email: [bfang@chbe.ubc.ca](mailto:bfang@chbe.ubc.ca)

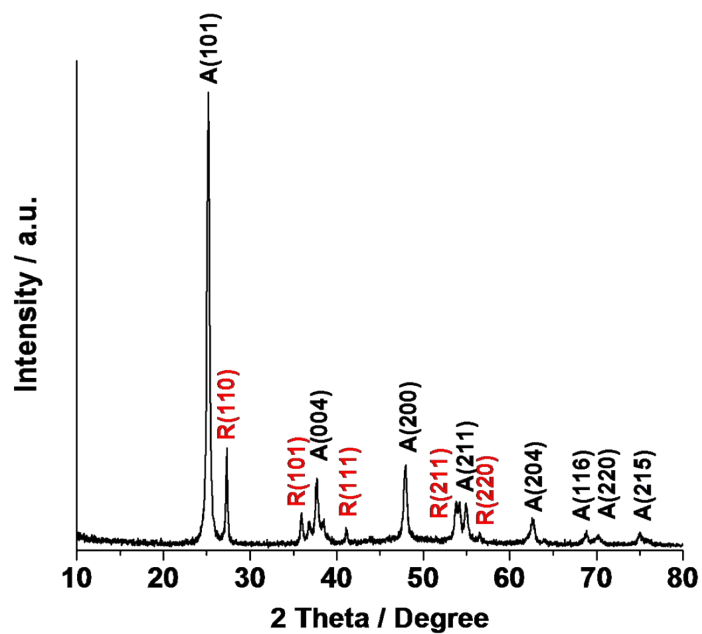

Figure S1 Typical XRD pattern for the commercial P25 TiO<sub>2</sub>.



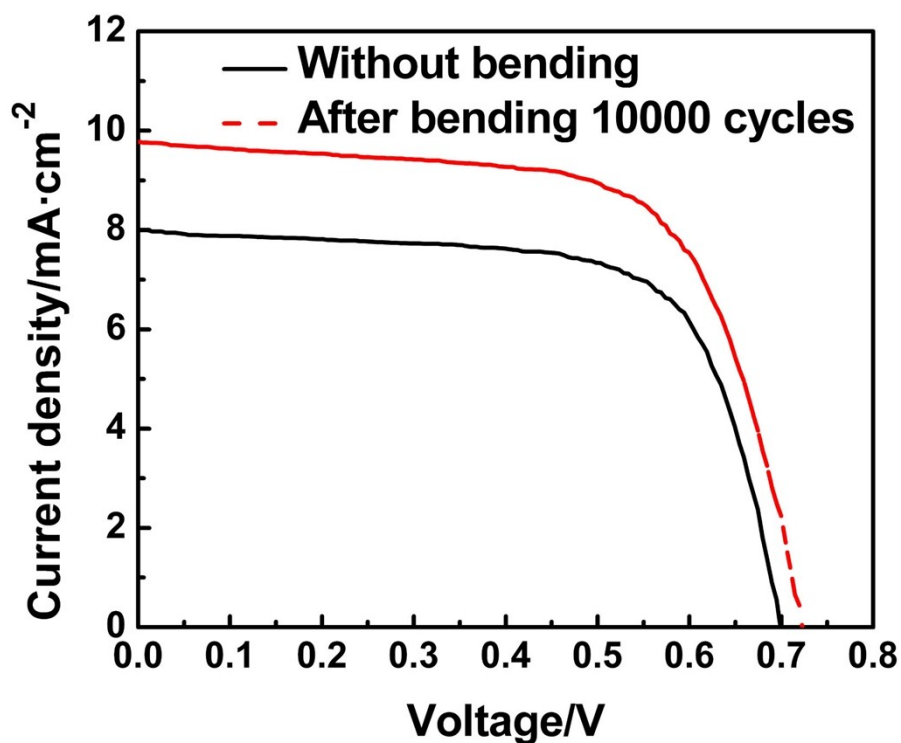

**Figure S2** Photovoltaic performance before bending and after 10000 cycles of bending with a radius of 18 mm.

**Figure S3** illustrates a generalized equivalent circuit for a complete DSC, where  $R_s$  is the equivalent series resistance,  $R_{CO}$  and  $C_{CO}$  stand for the resistance and capacitance at the TCO/TiO<sub>2</sub> interface, respectively.  $R_{TCO}$  and  $C_{TCO}$  represent the resistance and capacitance at the exposed TCO/electrolyte interface, respectively.  $R_t$  represents the electron transport resistance in the TiO<sub>2</sub> film, while  $R_{ct}$  stands for the charge transfer resistance at the TiO<sub>2</sub>/dye/electrolyte interface.  $C_{\mu}$  represents the capacitance of TiO<sub>2</sub> film, and  $Z_D$  stands for the Nernst diffusion resistance of the electrolyte.  $R_{Pt}$  and  $C_{Pt}$  stand for the charge

transfer resistance and electric double layer capacitance at the Pt/electrolyte interface, respectively.

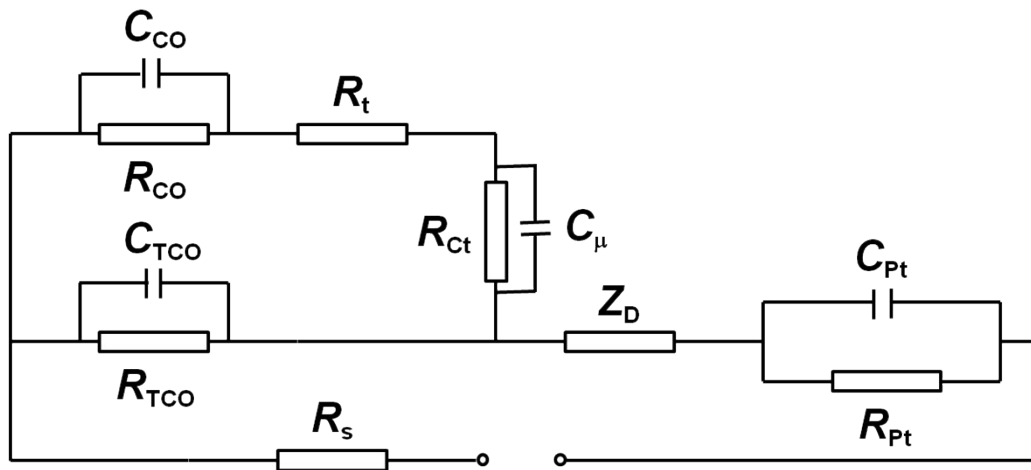

**Figure S3** Equivalent circuit for the flexible DSC.
